# Supplementary material for: Facile synthesis of 3D Ni@C nanocomposites derived from two kinds of petal-like Ni-based MOFs towards lightweight and efficient microwave absorbers
Source: Royal Society of Chemistry journal article supplement (doi:10.1039/d0nr07991j), 2021-01-01
Supplement: d0nr07991j1.pdf [file d0nr07991j1.pdf]

## Supplementary Information

### Facile synthesis of 3D Ni@C nanocomposites derived from two kinds of petal-like Ni-based MOFs towards lightweight and efficient microwave absorbers

Pengshu Yi<sup>ab</sup>, Zhengjun Yao<sup>ab\*</sup>, Jintang Zhou<sup>ab\*</sup>, Bo Wei<sup>ab</sup>, Lei Lei<sup>ab</sup>, Ruiyang Tan<sup>ab</sup>, Huiyuan Fan<sup>ab</sup>

<sup>a</sup>College of Materials and Technology, Nanjing University of Aeronautics and Astronautics, Nanjing 211100, China

<sup>b</sup>Key Laboratory of Material Preparation and Protection for Harsh Environment (Nanjing University of Aeronautics and Astronautics), Ministry of Industry and Information Technology, Nanjing 211100, China

Correspondence to: Zhengjun Yao (E-mail: yaozj1921@126.com)

Jintang Zhou (E-mail: imzjt@126.com)

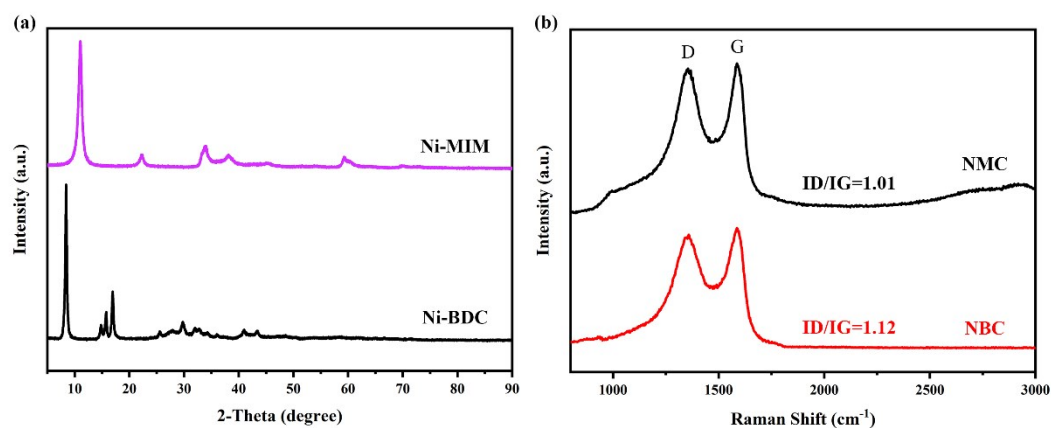

**Fig. S1** (a) XRD patterns of Ni-MIM and Ni-NBC. (b) Raman spectra of NMC and NBC.

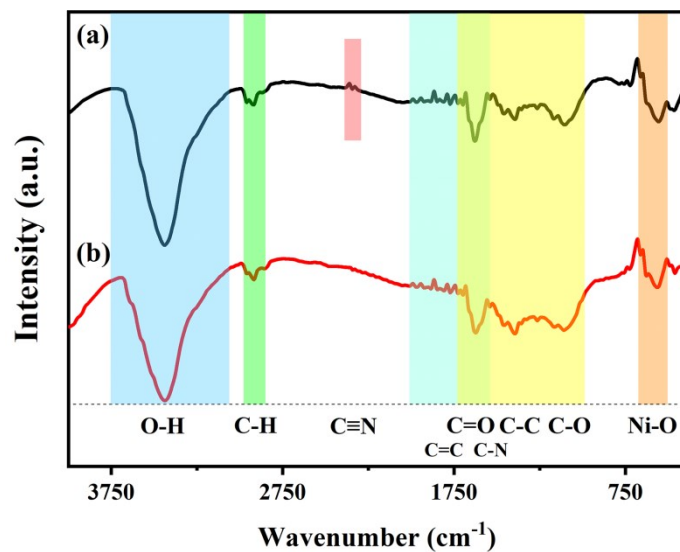

**Fig. S2** FT-IR spectra of (a) NMC@GN and (b) NBC@GN.

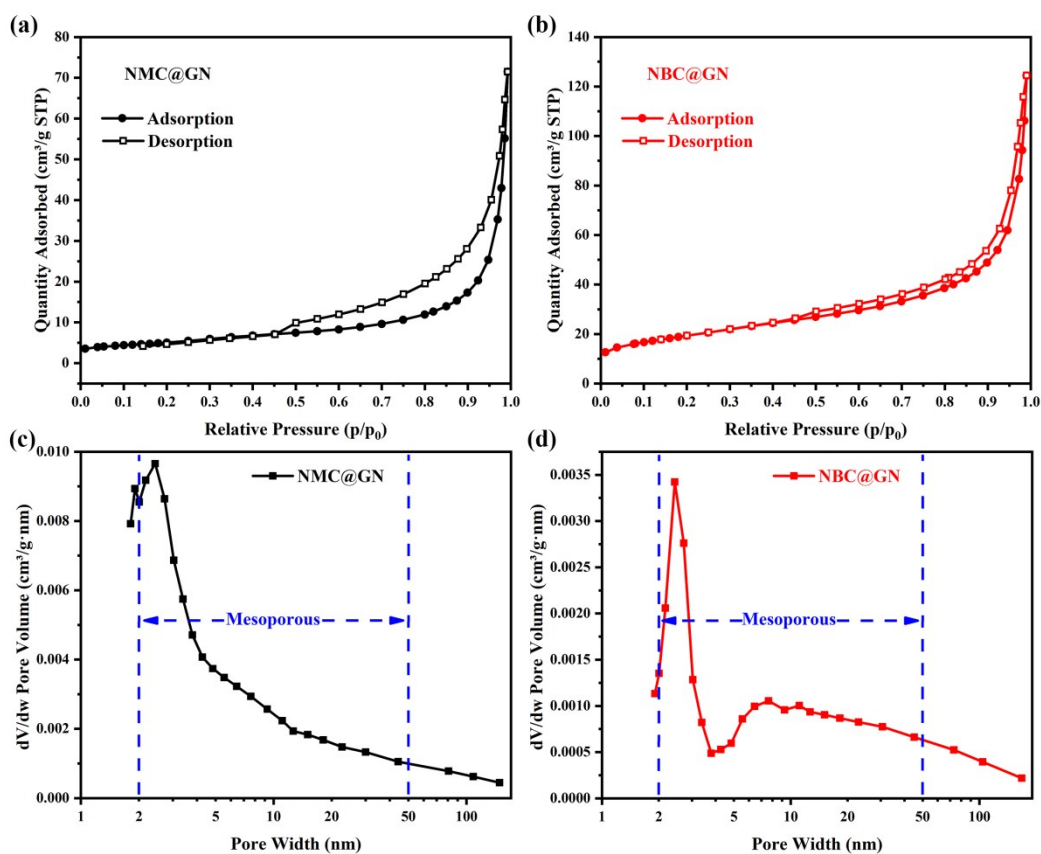

**Fig. S3** N<sub>2</sub> adsorption–desorption isotherms and pore size distributions of (a, c) NMC@GN and (b, d) NBC@GN.

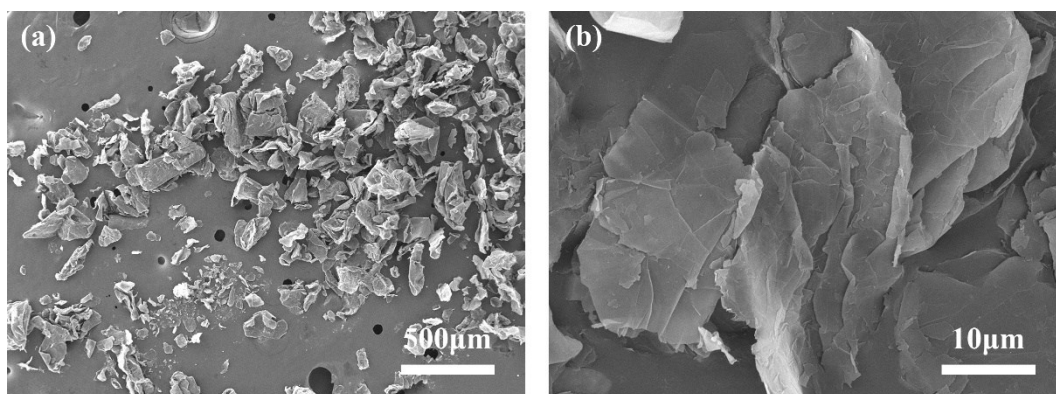

**Fig. S4** SEM images of GNs.

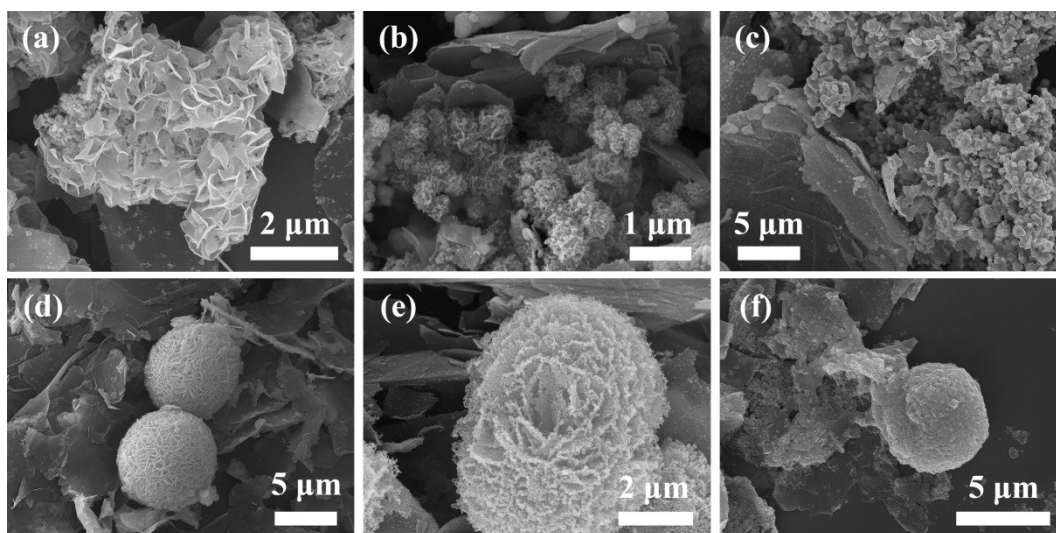

**Fig. S5** SEM images of NMC@GN and NBC@GN prepared at different pyrolysis temperatures: (a) NMC@GN-300°C, (b) NMC@GN-450°C, (c) NMC@GN-600°C, (d) NBC@GN-450°C, (e) NBC@GN-600°C, (f) NBC@GN-750°C.

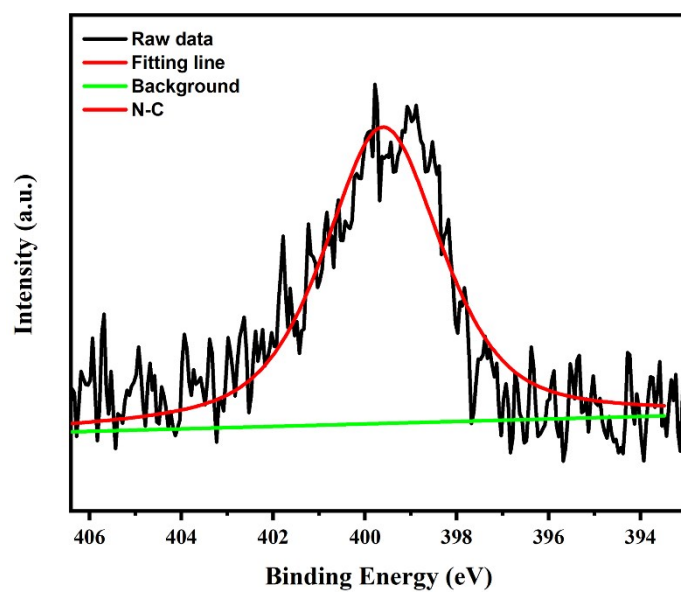

**Fig. S6** N 1s spectrum of NMC@GN.

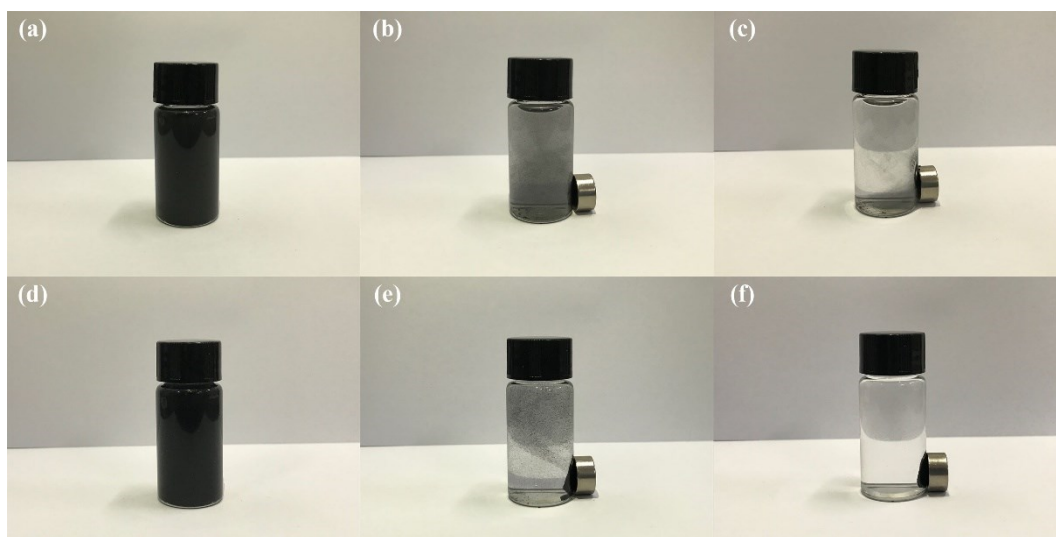

**Fig. S7** Schematic diagram of actual magnetic properties of (a-c) NMC@GN and (d-f) NBC@GN.

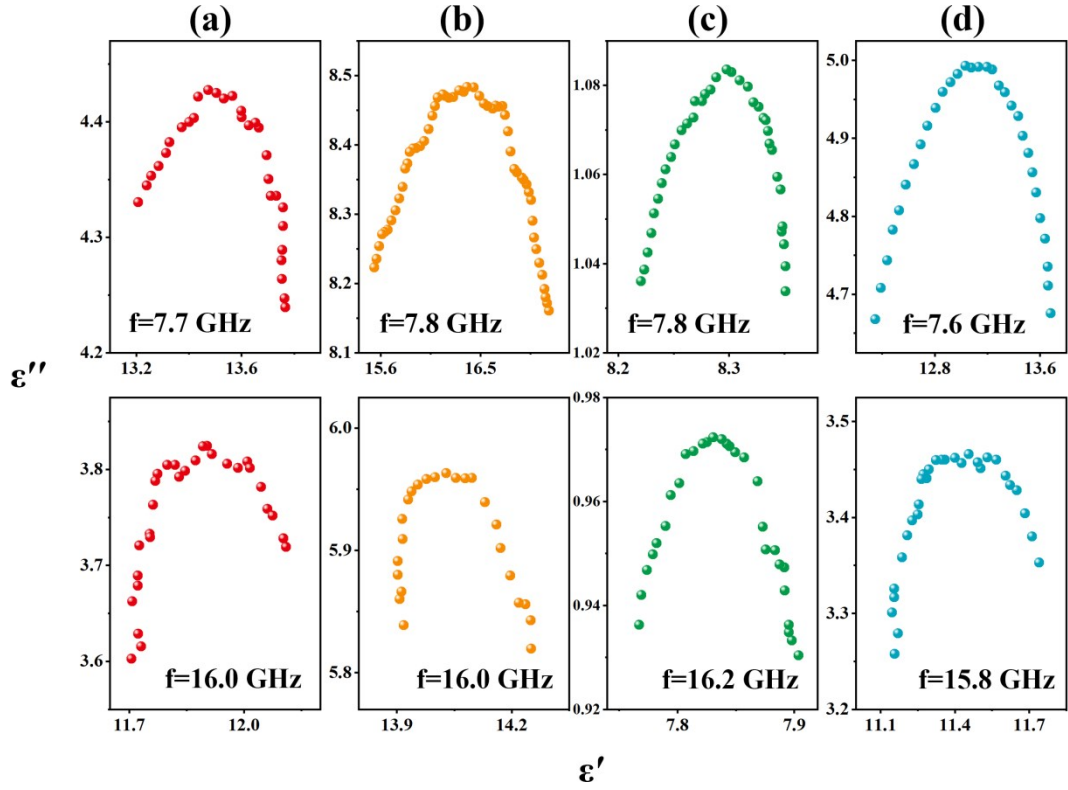

**Fig. S8** The Cole-Cole plots of (a) NMC@GN-10%, (b) NMC@GN-15%, (c) NBC@GN-10%, (d) NBC@GN-15%.

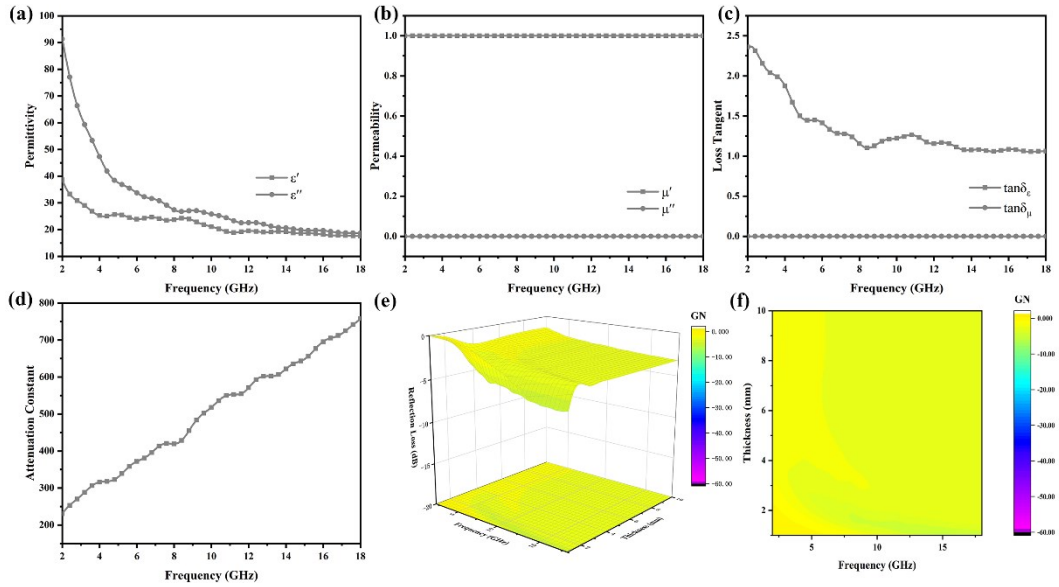

**Fig. S9** Complex permittivity (a), complex permeability (b), loss tangent (c), attenuation constant (d), 3D representations of  $R_L$  (e), 2D projection (f) of GNs.

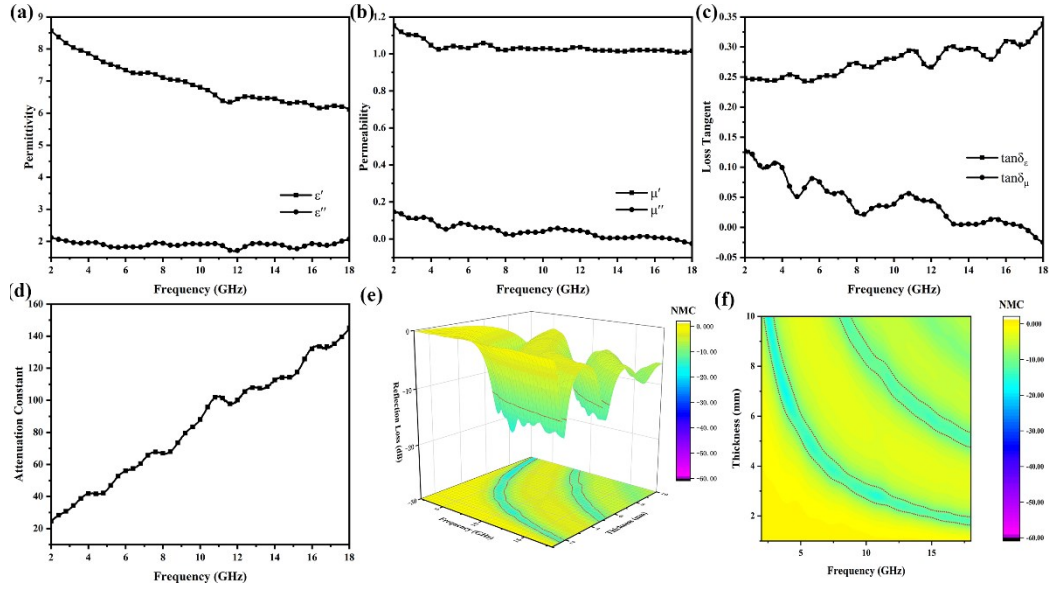

**Fig. S10** Complex permittivity (a), complex permeability (b), loss tangent (c), attenuation constant (d), 3D representations of  $R_L$  (e), 2D projection (f) of pure NMC.

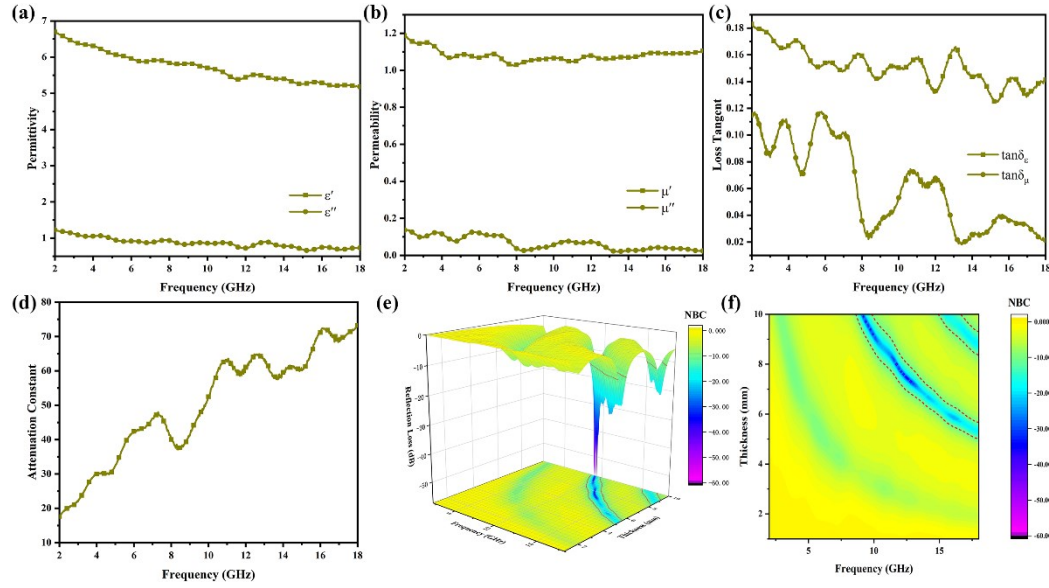

**Fig. S11** Complex permittivity (a), complex permeability (b), loss tangent (c), attenuation constant (d), 3D representations of  $R_L$  (e), 2D projection (f) of pure NBC.

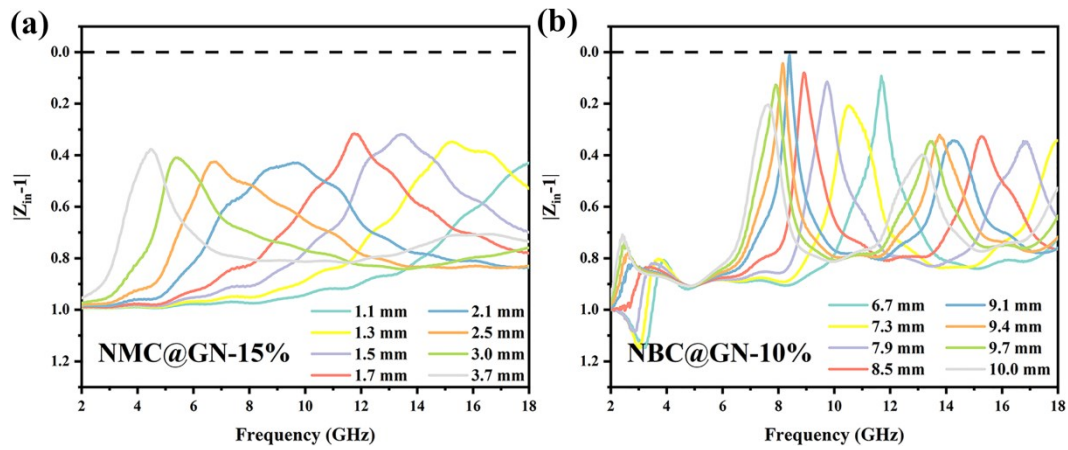

**Fig. S12** Normalized input impedance of (a) NMC@GN-15% and (b) NBC@GN-10%.

|            | $\epsilon_s$ | $\epsilon_\infty$ | $\tau$ (s)             | $\sigma$ (S/m) | MSE     |
|------------|--------------|-------------------|------------------------|----------------|---------|
| NMC@GN-10% | 112.84       | 3.13              | $9.04 \times 10^{-11}$ | 0.54           | 0.01134 |
| NMC@GN-15% | 230.21       | 1.64              | $2.36 \times 10^{-10}$ | 0.69           | 0.03622 |
| NBC@GN-10% | 35.15        | 7.76              | $3.66 \times 10^{-11}$ | 0.12           | 0.00796 |
| NBC@GN-15% | 58.43        | 1.56              | $1.13 \times 10^{-10}$ | 0.51           | 0.01953 |

**Table. S1** Detailed fitting results of all the samples

| Sample                  | Ratio (%) | RL <sub>min</sub> (dB) | Thickness (mm) | EAB (GHz) | Ref. |
|-------------------------|-----------|------------------------|----------------|-----------|------|
| Ni@C                    | 25%       | -59.5                  | 4.5            | 4.7       | 73   |
| CeO <sub>2-x</sub> /RGO | 50%       | -50.6                  | 1.5            | 5.84      | 72   |
| Ni/C                    | 30%       | -52.4                  | 1.6            | 5         | 14   |
| Ni@C@ZnO                | 25%       | -55.8                  | 2.5            | 4.1       | 71   |
| Co@NC                   | 25%       | -53.0                  | 1.8            | 6.2       | 74   |
| Ni@C-ZIF                | 40%       | -86.8                  | 2.7            | 2.14      | 16   |
| H-Co/C                  | 10%       | -50.7                  | 2.9            | 4.6       | 20   |

|                 |     |        |     |      |           |
|-----------------|-----|--------|-----|------|-----------|
| Co-<br>C/MWCNTs | 15% | -48.9  | -   | 2.99 | 22        |
| Co@NC@RGO       | 50% | -46.5  | 3.5 | 4.72 | 49        |
| NC@Co/NC        | 25% | -52.5  | 2.2 | 4.4  | 10        |
| NMC@GN          | 10% | -53.99 | 1.4 | 4.39 | this work |
| NBC@GN          | 15% | -49.58 | 1.4 | 4.03 | this work |

**Table. S2** Comparison of microwave absorption properties of MOFs derived materials in recent references and this work.
